# Supplementary material
Source: PubMed Central journal article supplement (PMC4128242)
Supplement: NIHMS589240-supplement-02.pdf [file NIHMS589240-supplement-02.pdf]

**Supplemental Tables:**

**Table S1: Quantification of hub cell number during conditional loss of *esg* in hub cells.** Complements Figure 3.

| <b>Genotype</b>                                 | <b>Hub marker</b>  | <b>1d at 18°C</b> | <b>10d at 18°C</b> | <b>20d at 18°C</b> | <b>5d at 29°C</b> | <b>10d at 29°C</b> |
|-------------------------------------------------|--------------------|-------------------|--------------------|--------------------|-------------------|--------------------|
| <i>updGAL4, UAS-GFP; UAS-esg-RNAi</i>           | Fas III            | 3.8±0.50 (16)     | 3.8±0.46 (22)      | 4.1±0.49 (30)      | -                 | 0.9±0.31 (11)      |
| <i>updGAL4, UAS-GFP; UAS-esg-RNAi</i>           | DE-Cad             | 4.5±0.48 (11)     | 3.1±0.64 (12)      | 4.1±0.35 (29)      | -                 | 0±0 (14)           |
| TOTAL                                           |                    | 4.1±0.35 (27)     | 3.6±0.34 (34)      | 4.1±0.34 (59)      | -                 | 0.4±0.46 (25)      |
|                                                 |                    | <b>1d at 18°C</b> | <b>5d at 18°C</b>  | <b>17d at 18°C</b> | <b>5d at 29°C</b> | <b>10d at 29°C</b> |
| <i>updGAL4, UAS-esg<sup>RNAi</sup>, gal80ts</i> | Fas III/<br>DE-Cad | 6.8±2.37 (23)     | 7.7±2.19 (25)      | 5.2±0.45 (31)      | 2.3±1.98 (15)     | 0.2±0.79 (38)      |
| <i>updGAL4;; gal80ts outcrossed to OreR</i>     | Fas III/<br>DE-Cad | 7.2±1.70 (15)     | 10.6±2.72 (25)     | -                  | 7.2±2.69 (16)     | 8.1±2.38 (30)      |

**Table S2: Quantification of Testes with GFP negative (*esg*) germline clones.** Complements Figure S4.

| <b>Genotype</b>                 | <b>3 days</b> | <b>5 days</b>                  | <b>7 days</b>                  |
|---------------------------------|---------------|--------------------------------|--------------------------------|
| Control ( <i>FRT40A</i> )       | 46/77 (60%)   | 17/38 (45%-E)<br>30/38 (79%-L) | 32/50 (64%-E)<br>38/50 (76%-L) |
| <i>FrT40A esg<sup>G66</sup></i> | 29/47 (62%)   | 4/8 (50%-E)<br>6/8 (75%-L)     | 27/52 (52%-E)<br>36/52 (70%-L) |
| <i>FRT40A esg<sup>L2</sup></i>  | 21/30 (70%)   | 2/11 (18%-E)<br>7/11 (68%-L)   | 23/61 (38%-E)<br>41/61 (67%-L) |

**Table S3: Escargot Interacting Proteins** (Excel File). Complements Figure 7.
